## S2 Appendix.

### Time cost of computing few-shot co-smoothing

The compute time depends on several factors. It scales with the number of trials  $k$ ,  $T$  the number of samples per trial, the number of neurons  $N^{k\text{-out}}$  and number of repeated resamples  $s$  and fitting of the regressor. Each repetition and neuron is an independent regression and therefore can be computed in parallel, provided the compute resources are available. For `mc_maze_20` each repetition for  $k = 64$ , took  $0.62 \pm 0.06$  seconds and we iterated over  $s = 12$  such regressions, requiring a total of 7.44 seconds.
